# Supplementary material
Source: PubMed Central journal article supplement (PMC5381270)
Supplement: NIHMS759839-supplement-2.pdf [file NIHMS759839-supplement-2.pdf]

**Supplementary Table 1. Sequences of siRNA used in the work**

| Gene name        | Sense strand             | Antisense strand         |
|------------------|--------------------------|--------------------------|
| Mst1 (Stk4)      | GAGccAAuAcuAuGAuuGAdTsdT | UcAAUcAuAGuAUUGGCUCdTsdT |
| Mst2 (Stk3) (#1) | uGGAcuAcuuuGAuAAGcAdTsdT | UGCUuAUcAAAGuAGUCcAdTsdT |
| Mst2 (Stk3) (#2) | ccuuGGcAuuAcuucuAuAdTsdT | uAuAGAAGuAAUGCcAAGGdTsdT |
| NF2 (#1)         | AGuucAAGAGAcAcGcAAAdTsdT | UUGCGUGAUCUCUUGAACUdTsdT |
| NF2 (#2)         | ucccGAAAAGGGuGAuAAAdTsdT | UUuAUcACCCUUUCGGGAdTsdT  |
| Yap1             | cGcuGAGuuccGAAAucuudTsdT | AAGAUUUCGGAACUcAGCGdTsdT |
| CK19             | GucAGuGuGGAGGuGGAuudTsdT | AAUCcACCUCcAcACUGACdTsdT |

Chemical modifications were introduced to stabilize siRNA *in vivo*, reduce off-target potential of the sense strand, and minimize immune response (2'-OMe modified nucleotides are in lower case, and phosphorothioate linkages are indicated by 's').

**Supplementary Table 2. Parameters of serum chemistry in mice treated with different combinations of siRNA targeting Hippo pathway**

|                         | <b>Triple siRNA</b> | <b>Triple siRNA + si-Yap1</b> |
|-------------------------|---------------------|-------------------------------|
| Albumin, g/dl           | 3.68±0.25           | 2.83±0.24***                  |
| Direct bilirubin, mg/dl | 0.59±0.41           | 0.02±0.01***                  |
| Total bilirubin, mg/dl  | 0.894±0.54          | 0.107±0.03***                 |
| Total bile acids, mg/dl | 148.1±53.2          | 15.3±4.8***                   |
| Cholesterol, mg/dl      | 132.8±17.2          | 65.2±11.4***                  |
| HDL, mg/dl              | 38.3±5.27           | 31.4±7.2                      |
| LDL, mg/dl              | 33.9±8.16           | 12.7±2.47***                  |
| Glucose, mg/dl          | 185±16.7            | 222±41.23                     |

\*\*\* p<0.001
